# Supplementary material for: Pollution characteristics and risk assessment of endocrine-disrupting chemicals in surface water of national (freshwater) aquatic germplasm resource reserves in Guangdong Province
Source: Royal Society of Chemistry journal article supplement (doi:10.1039/d4em00425f), 2024-01-01
Supplement: d4em00425f1.pdf [file d4em00425f1.pdf]

## Supplementary Material

### **Pollution characteristics and risk assessment of endocrine-disrupting chemicals in surface water of national (freshwater) aquatic germplasm resource reserves in Guangdong Province**

Tao Zhou<sup>a,b</sup>, Jie Li<sup>b</sup>, Weizhen Zhang<sup>a,\*</sup>, Yanyi Zeng<sup>b</sup>, Yuan Gao<sup>b</sup>, Haiyan Li<sup>b,\*</sup>,  
Wanling Yang<sup>b</sup>, Yongzhan Mai<sup>b</sup>, Qianfu Liu<sup>b</sup>, Caiqin, Hu<sup>b</sup>, Chao Wang<sup>b</sup>

<sup>a</sup> College of Ecology and Environment, Chengdu University of Technology, Chengdu, 610059, PR  
China

<sup>b</sup> Pearl River Fisheries Research Institute, Chinese Academy of Fishery Sciences, Fishery  
Ecological Environment Monitoring Center of Pearl River Basin, Ministry of Agriculture and  
Rural Affairs, Guangdong Provincial Key Laboratory of Aquatic Animal Immune Technology,  
Guangzhou 510380, China

**\*Corresponding author:**

**Weizhen Zhang** Email: [zwz@cdut.edu.cn](mailto:zwz@cdut.edu.cn)

**Haiyan Li** Email: [lihaiyan@prfri.ac.cn](mailto:lihaiyan@prfri.ac.cn)

**Mail address:** Pearl River Fisheries Research Institute, Chinese Academy of Fishery Science.  
Guangzhou, 510380, China.

## **Table Legends:**

**Table S1** Basic information on the sampling sites in the Guangdong Province reserve

**Table S2** Comparative analysis of EDCs concentrations in surface water and aquaculture  
germplasm conservation areas in China

**Table S3** The PNEC and EEF of the six target compounds to the aquatic species

**Table S4** Concentration of EDCs (ng/L) in Aquatic Germplasm Reserve during rainy season

**Table S5** Concentration of EDCs (ng/L) in Aquatic Germplasm Reserve during dry season**Table**

**Table S6** Water quality parameters during the rainy season in the Aquatic Germplasm Resource  
Conservation Area

**Table S7** Water quality parameters during the dry season in the Aquatic Germplasm Resource  
Conservation Area

**Table S8** Records of the surroundings of the sampling points in the protected area

Table S1 Basic information on the sampling sites in the Guangdong Province reserve

| protected area | Sampling | Longitude (E) | Latitude (N) | Area (hectares) | Comments                                                                                                                                                                | Primary protected species                                                                                                                  |
|----------------|----------|---------------|--------------|-----------------|-------------------------------------------------------------------------------------------------------------------------------------------------------------------------|--------------------------------------------------------------------------------------------------------------------------------------------|
| Xingfeng River | S1       | 114°19'8"     | 24°7'19"     | 490             | The Xinfeng River National Aquatic Germplasm Reserve is situated in Shaoguan City's Xinfeng County.                                                                     | <i>Silurus asotus</i> ; <i>Megalobrama amblycephala</i> ; <i>Squaliobarbus curriculus</i>                                                  |
|                | S2       | 114°28'47"    | 24°7'16"     |                 |                                                                                                                                                                         |                                                                                                                                            |
|                | S3       | 114°12'43"    | 24°3'28"     |                 |                                                                                                                                                                         |                                                                                                                                            |
| Liuxi River    | S4       | 113°53'58"    | 23°47'39"    | 2260            | Liuxi River <i>Spinibarbus hollandi</i> National Aquatic Germplasm Reserve is located in Conghua District, Guangzhou City.                                              | <i>Spinibarbus hollandi</i> ; <i>Tanichthys albonubes</i> ; <i>Anguilla marmorata</i> ; <i>Parazacco spilurus</i> ; <i>Rasborasteineri</i> |
|                | S5       | 113°46'59"    | 23°44'48"    |                 |                                                                                                                                                                         |                                                                                                                                            |
|                | S6       | 113°42'4"     | 23°41'29"    |                 |                                                                                                                                                                         |                                                                                                                                            |
| Ling River     | S7       | 114°5'52"     | 25°14'31"    | 523.3           | The Ling River Endemic Fish ( <i>Mauremys nigricans</i> ) National Aquatic Germplasm Reserve is situated in Nanxiong City, Shaoguan City.                               | <i>Mauremys nigricans</i>                                                                                                                  |
|                | S8       | 114°9'46"     | 25°17'24"    |                 |                                                                                                                                                                         |                                                                                                                                            |
|                | S9       | 114°9'50"     | 25°17'24"    |                 |                                                                                                                                                                         |                                                                                                                                            |
| Lian River     | S10      | 114°46'52"    | 24°33'6"     | 160             | The Lian Rive <i>Mastacembelus armatus</i> and <i>Banded Catfish</i> National Aquatic Germplasm Reserve is located in the Heping County, Heyuan City.                   | <i>Mastacembelus armatus</i> ; <i>Tachysurus fulvidraco</i> ; <i>Silurus asotus</i> ; <i>Anguilla marmorata</i> ; <i>Mystus guttatus</i>   |
|                | S11      | 114°48'53"    | 24°30'51"    |                 |                                                                                                                                                                         |                                                                                                                                            |
|                | S12      | 114°54'11"    | 24°22'22"    |                 |                                                                                                                                                                         |                                                                                                                                            |
| Yu nan         | S13      | 111°32'35"    | 23°14'11"    | 2350            | The West River <i>Megalobrama hoffmanni Herre et Mvers</i> National Aquatic Germplasm Reserve spans from Fengkai County in Zhaoqing City to Yunan County in Yunfu City. | <i>Megalobrama hoffmanni Herre et Mvers</i>                                                                                                |
|                | S14      | 111°33'6"     | 23°12'13"    |                 |                                                                                                                                                                         |                                                                                                                                            |
|                | S15      | 111°34'59"    | 23°11'12"    |                 |                                                                                                                                                                         |                                                                                                                                            |
| Deqing         | S16      | 111°48'50"    | 23°8'0"      | 2300            | The National Aquatic Germplasm Reserve for West River <i>Squaliobarbus</i>                                                                                              | <i>Squaliobarbus curriculus</i> ; <i>Erythroculter pseudobrevicauda</i> ;                                                                  |
|                | S17      | 111°51'30"    | 23°8'11"     |                 |                                                                                                                                                                         |                                                                                                                                            |

|              |     |            |           |       |                                                                                                                                                                                          |                                                                                                                                                                                                     |
|--------------|-----|------------|-----------|-------|------------------------------------------------------------------------------------------------------------------------------------------------------------------------------------------|-----------------------------------------------------------------------------------------------------------------------------------------------------------------------------------------------------|
|              | S18 | 111°53'43" | 23°7'25"  |       | <i>curriculus</i> and <i>Erythroculter pseudobrevicauda</i> is situated at the Nanjiang River estuary in Yunfu City.                                                                     | <i>Xenocypris davidi</i>                                                                                                                                                                            |
| Youshu Lake  | S19 | 115°51'55" | 24°43'30" | 510   | The Yushu Lake <i>Channa maculata</i> National Aquatic Germplasm Reserve is located in the Pingyuan District of Meizhou City.                                                            | <i>Channa maculate</i> ; <i>Silurus asotus</i> ; <i>Tachysurus fulvidraco</i> ; <i>Cirrhinus molitorella</i> ; <i>Hypophthalmichthys molitrix</i> ; <i>Aristichthys nobilis</i>                     |
|              | S20 | 115°52'20" | 24°42'56" |       |                                                                                                                                                                                          |                                                                                                                                                                                                     |
|              | S21 | 115°52'44" | 24°41'37" |       |                                                                                                                                                                                          |                                                                                                                                                                                                     |
| Shakou River | S22 | 113°35'32" | 24°30'43" | 860.5 | The Yingde section of the North River houses the national-level aquatic germplasm resource reserve for <i>Siniperca kneri</i> Garman. It is situated in Qingyuan City's Yingde district. | <i>Siniperca kneri</i> Garman                                                                                                                                                                       |
|              | S23 | 113°34'50" | 24°29'7"  |       |                                                                                                                                                                                          |                                                                                                                                                                                                     |
|              | S24 | 113°28'20" | 24°22'30" |       |                                                                                                                                                                                          |                                                                                                                                                                                                     |
| Tian River   | S25 | 112°30'38" | 22°17'2"  | 640   | The Tian River <i>Megalobrama hoffmanni</i> Herre et Mvers National Aquatic Germplasm Reserve is situated in Kaiping City, Jiangmen City, China.                                         | <i>Cyprinus carpio</i> ; <i>Carassius auratus</i> ; <i>Anguilla japonica</i> ; <i>Siniperca kneri</i> Garman; <i>Lateolabrax japonicus</i> ; <i>Megalobrama skolkovii</i> ; <i>Monopterus albus</i> |
|              | S26 | 112°33'2"  | 22°16'13" |       |                                                                                                                                                                                          |                                                                                                                                                                                                     |
|              | S27 | 112°34'30" | 22°17'58" |       |                                                                                                                                                                                          |                                                                                                                                                                                                     |
| Zeng River   | S28 | 113°50'34" | 23°24'0"  | 438.7 | Zeng River <i>Spinibarbus hollandi</i> and <i>Mastacembelus armatus</i> are found in the National Level area of Zengcheng District, Guangzhou, China.                                    | <i>Spinibarbus hollandi</i> ; <i>Mastacembelus armatus</i>                                                                                                                                          |
|              | S29 | 113°53'44" | 23°26'32" |       |                                                                                                                                                                                          |                                                                                                                                                                                                     |
|              | S30 | 113°53'23" | 23°25'21" |       |                                                                                                                                                                                          |                                                                                                                                                                                                     |
| Rong River   | S31 | 115°41'44" | 23°15'0"  | 220   | The Rong River Endemic Fish ( <i>Channa maculata</i> ) National Aquatic Germplasm Reserve is situated in Luhe County, Shanwei City.                                                      | <i>Mystus guttatus</i>                                                                                                                                                                              |
|              | S32 | 115°41'43" | 23°17'0"  |       |                                                                                                                                                                                          |                                                                                                                                                                                                     |
|              | S33 | 115°42'28" | 23°17'41" |       |                                                                                                                                                                                          |                                                                                                                                                                                                     |

|                              |     |            |           |      |                                                                                                                                                 |                                                |
|------------------------------|-----|------------|-----------|------|-------------------------------------------------------------------------------------------------------------------------------------------------|------------------------------------------------|
| Jian River                   | S34 | 110°39'36" | 21°15'1"  | 1000 | The Jian River <i>Sanguinolaria acuta</i> National Aquatic Germplasm Reserve is situated in Wuchuan City, Zhanjiang.                            | <i>Sanguinolaria acuta</i>                     |
|                              | S35 | 110°38'20" | 21°14'16" |      |                                                                                                                                                 |                                                |
|                              | S36 | 110°38'19" | 21°14'23" |      |                                                                                                                                                 |                                                |
| Xiaoxiang River<br>(Zaoqing) | S37 | 112°21'39" | 23°9'18"  | 1310 | The National Aquatic Germplasm Reserve of the Zhaoqing Section of the West River ( <i>Cyprinus carpio</i> ) is located in the city of Zhaoqing. | <i>Cyprinus carpio</i>                         |
|                              | S38 | 112°24'31" | 23°7'30"  |      |                                                                                                                                                 |                                                |
|                              | S39 | 112°24'52" | 23°3'14"  |      |                                                                                                                                                 |                                                |
| Shiku Lake                   | S40 | 116°5'9"   | 24°50'15" | 2248 | The Shiku Lake <i>Channa maculata</i> National Aquatic Germplasm Reserve is situated in Jiaoling County, Meizhou City.                          | <i>Mystus guttatus; Mastacembelus armatus;</i> |
|                              | S41 | 116°7'39"  | 24°42'59" |      |                                                                                                                                                 |                                                |
|                              | S42 | 116°8'35"  | 24°41'41" |      |                                                                                                                                                 |                                                |

Table S2 Comparative analysis of EDCs concentrations in surface water and aquaculture germplasm conservation areas in China

| Chemicals         | Sampling location          | Range       | Mean   | Reference  |
|-------------------|----------------------------|-------------|--------|------------|
| Bisphenol A (BPA) | Aquatic germplasm reserves | 5.31—921.7  | 254.9  | this study |
|                   | Liuxi River                | 2.26-1385.3 | 359.3  | 1          |
|                   | Luoma Lake                 | 49-140      | 86.1   | 2          |
|                   | Taihu Lake                 | 16.4-565.4  | 62.5   | 3-5        |
|                   | Pearl River                | 23.5-2189.9 | 252.5  | 6          |
|                   | Liao River Basin           | 2.6-1131    | 139    | 7          |
|                   | Xiangjiang River           | 5.6-3079.4  | 396    | 8          |
| Bisphenol F (BPF) | Huaihe R.                  | 413-3011    | 1543.5 | 9          |
|                   | Aquatic germplasm reserves | ND—65.7     | 15.3   | this study |
|                   | Liuxi River                | ND-474      | 169.6  | 10         |
|                   | Luoma Lake                 | 3.5-14      | 6.82   | 11         |
| Bisphenol S (BPS) | Taihu Lake                 | ND-1634     | 110.7  | 4, 11      |
|                   | Aquatic germplasm reserves | ND—87.96    | 26.7   | this study |
|                   | Liuxi River                | 19.9-65600  | 2342   | 10         |
|                   | Luoma Lake                 | ND-94       | 20.2   | 11         |
|                   | Taihu Lake                 | 4.1-1600    | 79     | 4          |
| EE2               | Yangtze River              | 0.18-14.9   | 1.39   | 12         |
|                   | Aquatic germplasm reserves | ND—5.71     | 1.2    | this study |
|                   | Luoma Lake                 | 4.25-12.9   | 7.97   | 13         |
|                   | Taihu Lake                 | ND-8.3      | 2.77   | 14         |
|                   | Liao River Basin           | 2.6-17112   | 596    | 15         |
|                   | East Dongting Lake         | ND-24.9     | 3.04   | 16         |
|                   | Erhai Lake                 | 0.5-16.1    | 3.03   | 17         |

|                             |                              |              |        |            |
|-----------------------------|------------------------------|--------------|--------|------------|
|                             | Xiangjiang River             | ND-21.4      | 5.37   | 8          |
| Estrone (E1)                | Aquatic germplasm reserves   | ND—2.44      | 0.2    | this study |
|                             | Liuxi River                  | ND-27.8      | 4.17   | 18         |
|                             | East Dongting Lake           | 2.26-41      | 5.63   | 19         |
|                             | Erhai Lake                   | 4.7-55       | 14.4   | 17         |
|                             | Liao River Basin             | 2.6-1235     | 66.2   | 7          |
|                             | Songhua River                | ND-37.3      | 10.5   | 20         |
|                             | Xiangjiang River             | 0.28-51.3    | 7.35   | 8          |
| 17- $\beta$ -estradiol (E2) | Aquatic germplasm reserves   | ND—3.89      | 0.52   | this study |
|                             | Yangtze R. (Nanjing section) | 2.5-4.1      | 3.2    | 21         |
|                             | Luoma Lake                   | 2.5-21.8     | 9.4    | 21         |
|                             | Erhai Lake                   | 1.1-3.0      | 1.7    | 22         |
|                             | Jiulong R                    | 25.6-60.3    | 36.3   | 23         |
|                             | Songhua R.                   | 15-29        | 20.8   | 24, 25     |
| NP                          | Pearl R.                     | 109.4-5046.9 | 1009.8 | 6, 26      |
|                             | Aquatic germplasm reserves   | 29.7—1780.2  | 323.6  | this study |
|                             | Yangtze R. (Nanjing section) | 11.4-858     | 297.1  | 21         |
|                             | Yellow R.                    | 165.8-1187.6 | 577.9  | 27         |
|                             | Huaihe R.                    | 76.1-1532.6  | 563.7  | 9          |
|                             | Haihe R. (Tianjin)           | 79.2-228.2   | 151.5  | 28         |
|                             | Erhai Lake                   | 6.6-17.9     | 13.3   | 22         |
|                             | Songhua R.                   | 25-1261      | 167.9  | 24, 25     |
| OP                          | Aquatic germplasm reserves   | 5.11—243.6   | 72     | this study |
|                             | Pearl R.                     | 46.9-514.3   | 168.6  | 6, 26      |
|                             | Yangtze R. (Nanjing section) | 1.2-116      | 31.2   | 21         |

|  |                    |           |      |    |
|--|--------------------|-----------|------|----|
|  | Yellow R.          | 2.4-14.5  | 4.7  | 27 |
|  | Huaihe R.          | 21.1-63.6 | 37.5 | 9  |
|  | Haihe R. (Tianjin) | 33.3-83.3 | 63.8 | 28 |
|  | Erhai Lake         | 2.0-15.8  | 6.3  | 22 |



Table S3 The PNEC and EEF of the six target compounds to the aquatic species

| Compound                    | Taxon       | Species                | Endpoint              | Value (µg/L) | AF   | PNEC (µg/L) | Reference | EEF <sub>i</sub>                                                           |
|-----------------------------|-------------|------------------------|-----------------------|--------------|------|-------------|-----------|----------------------------------------------------------------------------|
| BPA                         | Alga        | /                      | EC <sub>50</sub>      | 2700         | 1000 | 2.7         | 8         | 3.90×10 <sup>-4</sup> <sup>29</sup><br>2.36×10 <sup>-5</sup> <sup>30</sup> |
|                             | Daphnid     | D. magna               | EC <sub>50</sub>      | 10200        | 1000 | 10.2        | 31        |                                                                            |
|                             | Fish        | /                      | EC <sub>50</sub>      | 158          | 1000 | 0.158       | 32        |                                                                            |
|                             | Fish        | D. rerio               | 21d-NOEC              | 500          | 100  | 5           | 33        |                                                                            |
| BPS                         | Daphnid     | D. magna               | EC <sub>50</sub> ·48h | 55000        | 1000 | 55          | 34        | 1.06×10 <sup>-6</sup> <sup>35</sup>                                        |
|                             | Fish        | D. rerio               | 48 h-LC <sub>50</sub> | 199000       | 1000 | 199         | 36        |                                                                            |
|                             | Alga        | C. vulgaris            | EC <sub>50</sub>      | 25190        | 1000 | 25.2        | 37        |                                                                            |
| BPF                         | Daphnia     | D. magna               | EC <sub>50</sub> ·48h | 8700         | 1000 | 8.7         | 38        | 1.08×10 <sup>-4</sup> <sup>35</sup>                                        |
|                             | Fish        | D. rerio               | 96h-EC <sub>50</sub>  | 7500         | 1000 | 7.5         | 39        |                                                                            |
|                             | Alga        | D. subspicatus         | 48h-LC <sub>50</sub>  | 22100        | 1000 | 22.1        | 38        |                                                                            |
| Estrone(E1)                 | Crustaceans | Acartia tonsa          | LC <sub>50</sub>      | 410          | 1000 | 0.41        | 40        | 0.272 <sup>30</sup><br>0.11 <sup>29</sup>                                  |
|                             | Fish        | Oncorhynchus mykiss    | NOEC·14d              | 0.00074      | 10   | 0.000074    | 40        |                                                                            |
|                             | Fish        | Zebrafish              | LC <sub>50</sub>      | 6            | 1000 | 0.006       | 41        |                                                                            |
|                             | Alge        | Microcystis aeruginosa | 14d-EC <sub>50</sub>  | 276680       | 1000 | 276.7       | 42        |                                                                            |
| 17-β-estradiol (E2)         | Alga        | R. subcapitata         | EC <sub>50</sub> 48h  | 9600         | 1000 | 9.6         | 43        | 1.0 <sup>29</sup>                                                          |
|                             | Daphnid     | D. magna               | EC <sub>50</sub> 48h  | 2870         | 1000 | 2.87        | 44        |                                                                            |
|                             | Fish        | D. rerio               | EC <sub>50</sub>      | 2140         | 1000 | 2.14        | 45        |                                                                            |
|                             | Fish        | D. rerio               | NOEC (reproduction)   | 0.0048       | 10   | 0.00048     | 46        |                                                                            |
| 17-α-ethinylestradiol (EE2) | Alga        | D. subspicatus         | EC <sub>50</sub>      | 12400        | 1000 | 12.4        | 47        | 1.76 <sup>48</sup><br>1.25 <sup>23</sup>                                   |
|                             | Daphnid     | D. magna               | EC <sub>50</sub> 24h  | 6400         | 1000 | 6.4         | 49        |                                                                            |
|                             | Fish        | D. rerio               | LC <sub>50</sub>      | 1700         | 1000 | 1.7         | 50        |                                                                            |

|    |         |                        |                                      |         |      |          |    |                          |
|----|---------|------------------------|--------------------------------------|---------|------|----------|----|--------------------------|
|    | Fish    | Threespine stickleback | N(L)OEC                              | 0.00175 | 10   | 0.000175 | 51 |                          |
| NP | Alga    | R. subcapitata         | EC <sub>50</sub> 72h<br>(population) | 530     | 1000 | 0.53     | 52 | 6.49×10 <sup>-4 30</sup> |
|    | Daphnid | D. magna               | 48h-LC <sub>50</sub>                 | 180     | 1000 | 0.18     | 53 |                          |
|    | Fish    | Xiphophorus helleri    | 96h-LC <sub>50</sub>                 | 206     | 1000 | 0.206    | 54 |                          |
| OP | Algae   | Microcystis aeruginosa | 10d-EC <sub>50</sub>                 | 67      | 1000 | 0.067    | 55 | 8.73×10 <sup>-4 30</sup> |
|    | Daphnid | Daphnia magna          | 24h-EC <sub>50</sub>                 | 303     | 1000 | 0.303    | 56 |                          |
|    | Fish    | Zoarces viviparus      | 48h-LC <sub>50</sub>                 | 180     | 1000 | 0.18     | 53 |                          |

Table S4 Concentration of EDCs (ng/L) in Aquatic Germplasm Reserve during rainy season

| EDCs | Xinfeng River          |            | Liuxi Lake             |            | Ling River             |            | Lian River             |            | Yunan                  |            | Deqing                 |            | Youshu Lake            |            |
|------|------------------------|------------|------------------------|------------|------------------------|------------|------------------------|------------|------------------------|------------|------------------------|------------|------------------------|------------|
|      | Mean ± SD <sup>a</sup> | Media<br>n |
| OP   | 115.4±34.4             | 131.4      | 26.3±11.8              | 20.7       | 109.4±69               | 85.9       | 22.9±13.9              | 21         | 63.1±5.22              | 65.8       | 8.53±2.02              | 9.52       | 71.3±39.1              | 75.1       |
| NP   | 342.5±157.7            | 258.7      | 676.2±324.9            | 751.2      | 167.5±40.9             | 154.1      | 174.3±18.9             | 164        | 147.4±23               | 152.4      | 140.3±103.7            | 81.4       | 222.7±39.5             | 221.7      |
| BPF  | 42.5±20.1              | 36.7       | 18.1±4.41              | 24.7       | 2.79±0.03              | 2.8        | 3.24±0.69              | 3.5        | 27.6±9.77              | 25.1       | 7.49±6.07              | 10.4       | 9.35±4.17              | 9.95       |
| BPA  | 248.7±393.4            | 25.1       | 62.2±53.9              | 61.4       | 74.7±17.7              | 72.7       | 81.5±25.6              | 81.1       | 323.2±308.7            | 167.5      | 121.1±23.1             | 123.7      | 106.7±51.7             | 86         |
| BPS  | 35±12.2                | 36.1       | 8.7±2.78               | 9.44       | 26.1±4.45              | 26         | 18.5±2.74              | 19.8       | 36.9±2.55              | 36.3       | 27.1±2.22              | 28         | 31±6.05                | 28.3       |
| E1   | 0.01±0.02              | 0.01       | 0.16±0.15              | 0.16       | 0.06±0.04              | 0.05       | 0.04±0.03              | 0.05       | 0.34±0.1               | 0.37       | 0.07±0.09              | 0.02       | 0.31±0.22              | 0.26       |
| E2   | 0.03±0.02              | 0.02       | 0.11±0.13              | 0.06       | 0.14±0.22              | 0.03       | 0.37±0.07              | 0.4        | 0.96±0.14              | 0.94       | 0.26±0.05              | 0.24       | 0.96±0.57              | 0.93       |
| EE2  | 0.97±0.21              | 0.91       | 1.81±0.87              | 1.49       | 0.38±0.66              | 0.0        | 0.34±0.6               | 0.0        | 1.17±0.67              | 1.31       | 0.69±0.43              | 0.47       | 1.69±0.83              | 2.11       |
|      | Tian River             |            | Zen River              |            | Rong River             |            | Shakou                 |            | Jian River             |            | Xiaoxiang River        |            | Shiku Lake             |            |
| OP   | 99.8±16.8              | 95         | 107.5±82.4             | 119.1      | 71.7±31.6              | 77.7       | 76.1±21.9              | 75.4       | 19.5±11                | 15.7       | 45.9±30                | 57.5       | 23.1±9.5               | 18.9       |
| NP   | 838.3±838.7            | 562.5      | 427.2±124.6            | 408.2      | 289.1±142.4            | 292.5      | 642.1±484.1            | 736.4      | 145.1±46.3             | 145.3      | 179.5±121.4            | 203.4      | 212.5±136.6            | 151.9      |
| BPF  | 35.2±28.5              | 30.9       | 21.9±12.7              | 18         | 7.49±7.59              | 3.81       | 5.39±2.89              | 4.95       | 15.7±7.15              | 19.6       | 23.8±14.2              | 24.4       | 9.45±5.87              | 10         |
| BPA  | 257.5±43.2             | 250.3      | 118.9±62.6             | 89.5       | 345.5±460.9            | 82.7       | 476±393.3              | 549.8      | 107.6±10.2             | 108.9      | 173±144.3              | 108.9      | 355±369.3              | 157.4      |
| BPS  | 33.6±47.1              | 7.03       | 34.1±5.87              | 33.8       | 33.1±14.4              | 25.6       | 13.3±23                | 0.0        | 17±24.6                | 3.09       | 28.9±15.7              | 29.1       | 36.3±9.84              | 39.9       |
| E1   | 0.15±0.04              | 0.12       | 0.24±0.12              | 0.3        | 0.07±0.07              | 0.07       | 0.81±1.41              | 0.0        | 0.34±0.2               | 0.29       | 0.23±0.03              | 0.24       | 0.03±0.05              | 0.0        |
| E2   | 1.93±1.7               | 1.15       | 0.84±0.17              | 0.83       | 0.11±0.1               | 0.15       | 0.0±0.0                | 0.0        | 1.01±0.39              | 0.83       | 0.58±0.05              | 0.55       | 0.52±0.14              | 0.56       |
| EE2  | 1.99±0.5               | 2.2        | 1.25±1.03              | 1.84       | 0.81±0.71              | 0.97       | 0.1±0.18               | 0.0        | 1.95±1.54              | 2.36       | 2.33±0.54              | 2.18       | 3.12±2.54              | 3.02       |

a standard deviation.

Table S5 Concentration of EDCs (ng/L) in Aquatic Germplasm Reserve during dry season

| EDCs | Xinfeng River          |        | Liuxi Lake             |        | Ling River             |        | Lian River             |        | Yunan                  |        | Deqing                 |        | Youshu Lake            |        |
|------|------------------------|--------|------------------------|--------|------------------------|--------|------------------------|--------|------------------------|--------|------------------------|--------|------------------------|--------|
|      | Mean ± SD <sup>a</sup> | Median |
| OP   | 162.4±73.3             | 142.7  | 40.7± 15.7             | 47.7   | 37.9± 21.6             | 31.9   | 45.1± 18.8             | 36.3   | 101.2± 24.4            | 105.2  | 6.41± 1.54             | 6.01   | 48± 54.3               | 22.6   |
| NP   | 485.9±261.8            | 344.5  | 556.6± 152.1           | 518.4  | 424± 364.8             | 338.2  | 401.1± 202.8           | 446.2  | 286.2± 90.5            | 244.7  | 70± 46.3               | 59.8   | 274.6± 245.4           | 158.1  |
| BPF  | 18.8±13.7              | 15.6   | 9.57± 3.89             | 8.58   | 6.35± 2.49             | 7.5    | 3.61± 0.55             | 3.32   | 31.8± 17.3             | 31.2   | 4.27± 0.4              | 4.49   | 22.2± 12.1             | 27.7   |
| BPA  | 113.5±97.9             | 139.4  | 301± 14.8              | 299.7  | 511.6± 314.3           | 465.6  | 492.3± 372.4           | 297.3  | 206.4± 72.1            | 170.5  | 428.6± 118.3           | 394.7  | 276.9± 238.7           | 150.7  |
| BPS  | 15±2.78                | 14     | 23.8± 3.89             | 24.7   | 32.8± 15.5             | 24.2   | 24.1± 5.67             | 21.1   | 23.5± 11.4             | 28.9   | 45.7± 34.4             | 32     | 28.1± 13.2             | 26.8   |
| E1   | 0.2±0.11               | 0.15   | 0.06± 0.06             | 0.05   | 0.18± 0.15             | 0.16   | 0.06± 0.02             | 0.05   | 0.33± 0.26             | 0.29   | 0.04± 0.01             | 0.05   | 0.44± 0.49             | 0.3    |
| E2   | 1.09±0.83              | 0.69   | 0.27± 0.11             | 0.27   | 0.42± 0.32             | 0.32   | 0.27± 0.01             | 0.27   | 0.72± 0.88             | 0.35   | 0.19± 0.07             | 0.19   | 0.98± 0.89             | 0.65   |
| EE2  | 1.25±0.23              | 1.38   | 0.29± 0.5              | 0.0    | 0.25± 0.24             | 0.27   | 0.1± 0.16              | 0.0    | 0.5± 0.87              | 0.0    | 1.33± 1.2              | 1.08   | 1.56± 0.84             | 1.1    |
|      | Tian River             |        | Zen River              |        | Rong River             |        | Shakou                 |        | Jian River             |        | Xiaoxiang River        |        | Shiku Lake             |        |
| OP   | 110.1± 25.4            | 104.6  | 172.9± 83.3            | 214.5  | 52.7± 42.4             | 29.7   | 142.2± 80.9            | 173.9  | 36.2± 15.6             | 33.2   | 68.1± 34.1             | 49.3   | 132.5± 106.6           | 124.3  |
| NP   | 288.1± 107.9           | 250.5  | 349± 169.3             | 331.8  | 160.8± 43.3            | 137.9  | 400.7± 309.2           | 405.8  | 267.3± 118.6           | 272.8  | 256± 121.6             | 218.5  | 234.6± 129.9           | 187    |
| BPF  | 14± 16.2               | 10.3   | 39.1± 10.4             | 38.5   | 3.47± 2.25             | 3.02   | 3.6± 0.95              | 3.34   | 7.69± 3.71             | 7.18   | 28.2± 19.1             | 24.8   | 6.89± 5.06             | 8.89   |
| BPA  | 367.1± 9.01            | 364.9  | 184.2± 101.3           | 144.1  | 143± 84.1              | 152.4  | 182± 143.7             | 135.6  | 310± 103.3             | 278.3  | 577.4± 326.4           | 564.1  | 192.4± 48.8            | 203.7  |
| BPS  | 14.2± 7.62             | 17     | 36.4± 12               | 38.7   | 26.6± 15.5             | 18.2   | 14.5± 9.27             | 13.4   | 12.5± 10.9             | 7.12   | 63.3± 26.9             | 76.7   | 8.79± 5.28             | 9.64   |
| E1   | 0.21± 0.33             | 0.04   | 0.36± 0.52             | 0.09   | 0.17± 0.09             | 0.21   | 0.13± 0.21             | 0.01   | 0.22± 0.03             | 0.2    | 0.03± 0.01             | 0.04   | 0.06± 0.04             | 0.05   |
| E2   | 0.61± 0.76             | 0.27   | 0.64± 0.41             | 0.79   | 0.37± 0.12             | 0.38   | 0.33± 0.06             | 0.36   | 0.29± 0.06             | 0.29   | 0.18± 0.1              | 0.17   | 0.29± 0.14             | 0.31   |
| EE2  | 2.66± 0.98             | 2.96   | 0.78± 0.96             | 0.34   | 2.0± 0.86              | 1.86   | 0.41± 0.71             | 0.0    | 0.28± 0.3              | 0.23   | 0.91± 0.81             | 1.21   | 1.39± 0.7              | 1.73   |

<sup>a</sup> a standard deviation.

Table S6 Water quality parameters during the rainy season in the Aquatic Germplasm Resource Conservation Area

| EDCs           | Xinfeng River              |        | Liuxi Lake                 |        | Ling River                 |        | Lian River                 |        | Yunan                      |         | Deqing                     |        | Youshu Lake                |        |
|----------------|----------------------------|--------|----------------------------|--------|----------------------------|--------|----------------------------|--------|----------------------------|---------|----------------------------|--------|----------------------------|--------|
|                | Mean $\pm$ SD <sup>a</sup> | Median  | Mean $\pm$ SD <sup>a</sup> | Median | Mean $\pm$ SD <sup>a</sup> | Median |
| EC (us/cm)     | 105.6 $\pm$ 39.1           | 111.7  | 100.6 $\pm$ 32.2           | 83.4   | 48.5 $\pm$ 5.96            | 49     | 98.3 $\pm$ 24              | 91.8   | 315.9 $\pm$ 22.6           | 325.9   | 312.1 $\pm$ 13.4           | 311.6  | 87.6 $\pm$ 3.43            | 89.4   |
| WT(°C)         | 28.4 $\pm$ 1.3             | 27.9   | 30.7 $\pm$ 3.57            | 30.4   | 34.7 $\pm$ 0.72            | 34.6   | 25 $\pm$ 2.29              | 25.9   | 32.2 $\pm$ 1.31            | 32.9    | 31.8 $\pm$ 0.2             | 31.9   | 29.8 $\pm$ 1.96            | 30.7   |
| Salinity (pus) | 0.05 $\pm$ 0.02            | 0.05   | 0.04 $\pm$ 0.02            | 0.03   | 0.02 $\pm$ 0.0             | 0.02   | 0.05 $\pm$ 0.01            | 0.04   | 0.14 $\pm$ 0.0             | 0.14    | 0.13 $\pm$ 0.01            | 0.13   | 0.04 $\pm$ 0.0             | 0.04   |
| pH             | 7.77 $\pm$ 0.39            | 7.87   | 8.27 $\pm$ 0.69            | 8.02   | 7.47 $\pm$ 0.3             | 7.62   | 7.92 $\pm$ 0.28            | 7.86   | 8.34 $\pm$ 0.33            | 8.2     | 8.13 $\pm$ 0.04            | 8.13   | 8.1 $\pm$ 0.82             | 8.42   |
| DO (mg/L)      | 5.8 $\pm$ 1.02             | 6.38   | 7.35 $\pm$ 0.84            | 7.76   | 6.77 $\pm$ 0.28            | 6.81   | 6.83 $\pm$ 0.74            | 6.48   | 7.35 $\pm$ 1.59            | 6.62    | 6.41 $\pm$ 0.1             | 6.43   | 6.79 $\pm$ 1.82            | 6.95   |
| EDCs           | Tian River                 |        | Zen River                  |        | Rong River                 |        | Shakou                     |        | Jian River                 |         | Xiaoxiang River            |        | Shiku Lake                 |        |
|                | Mean $\pm$ SD <sup>a</sup> | Median  | Mean $\pm$ SD <sup>a</sup> | Median | Mean $\pm$ SD <sup>a</sup> | Median |
| EC (us/cm)     | 199.2 $\pm$ 18             | 193.9  | 106.3 $\pm$ 5.97           | 107.8  | 55.8 $\pm$ 12.1            | 59.1   | 230.8 $\pm$ 38.6           | 213.6  | 40148.5 $\pm$ 13456.6      | 45587.2 | 325.1 $\pm$ 1.18           | 325.6  | 118.3 $\pm$ 28.2           | 133.1  |
| WT(°C)         | 30.5 $\pm$ 0.97            | 31     | 28.8 $\pm$ 0.91            | 28.4   | 31.4 $\pm$ 2.35            | 32.4   | 32.6 $\pm$ 1.03            | 32.8   | 29.9 $\pm$ 0.4             | 30      | 30.3 $\pm$ 0.35            | 30.5   | 28.9 $\pm$ 3.92            | 29.3   |
| Salinity (pus) | 0.08 $\pm$ 0.01            | 0.08   | 0.05 $\pm$ 0.01            | 0.05   | 0.02 $\pm$ 0.01            | 0.02   | 0.1 $\pm$ 0.01             | 0.09   | 23.6 $\pm$ 8.67            | 27      | 0.14 $\pm$ 0.0             | 0.14   | 0.05 $\pm$ 0.01            | 0.05   |
| pH             | 7.32 $\pm$ 0.03            | 7.32   | 7.42 $\pm$ 0.19            | 7.4    | 7.74 $\pm$ 0.24            | 7.69   | 8.03 $\pm$ 0.03            | 8.04   | 8.17 $\pm$ 0.21            | 8.05    | 8.21 $\pm$ 0.01            | 8.21   | 8.12 $\pm$ 0.86            | 7.66   |
| DO (mg/L)      | 5.06 $\pm$ 0.89            | 5.53   | 4.94 $\pm$ 0.21            | 5.04   | 7.73 $\pm$ 0.53            | 7.76   | 7.08 $\pm$ 0.68            | 6.71   | 5.98 $\pm$ 0.44            | 6.19    | 6.7 $\pm$ 0.08             | 6.75   | 6.92 $\pm$ 3.93            | 5.17   |

<sup>a</sup> a standard deviation.

Table S7 Water quality parameters during the dry season in the Aquatic Germplasm Resource Conservation Area

a standard deviation.

| EDCs           | Xinfeng River          |            | Liuxi Lake             |            | Ling River             |            | Lian River             |            | Yunan                  |            | Deqing                 |            | Youshu Lake            |            |
|----------------|------------------------|------------|------------------------|------------|------------------------|------------|------------------------|------------|------------------------|------------|------------------------|------------|------------------------|------------|
|                | Mean ± SD <sup>a</sup> | Media<br>n |
| EC (us/cm)     | 123.1±29.7             | 117.4      | 97.4±54.5              | 73.4       | 47.5±14.4              | 46.1       | 128.4±38.9             | 120.1      | 298.9±5.69             | 300.8      | 294.7±5.59             | 293        | 90.5±8.0               | 88.8       |
| WT(°C)         | 22.8±3.14              | 22.1       | 17.2±1.15              | 17.4       | 13.7±0.91              | 13.9       | 17±0.68                | 16.7       | 18.6±0.34              | 18.8       | 17.7±1.28              | 17.1       | 19.2±0.87              | 19.1       |
| Salinity (pus) | 0.06±0.02              | 0.06       | 0.05±0.03              | 0.04       | 0.03±0.01              | 0.03       | 0.07±0.02              | 0.06       | 0.17±0.01              | 0.17       | 0.17±0.01              | 0.17       | 0.05±0.01              | 0.05       |
| pH             | 7.46±0.14              | 7.53       | 7.09±0.64              | 7.33       | 7.51±0.3               | 7.48       | 7.8±0.44               | 7.68       | 7.5±0.52               | 7.31       | 7.85±0.2               | 7.81       | 7.85±0.42              | 7.7        |
| DO (mg/L)      | 8.01±1.56              | 8.23       | 9.35±0.3               | 9.33       | 9.88±0.24              | 9.82       | 9.01±0.45              | 8.85       | 10.4±0.06              | 10.4       | 10.5±0.19              | 10.4       | 10.9±0.12              | 10.9       |
| EDCs           | Tian River             |            | Zen River              |            | Rong River             |            | Shakou                 |            | Jian River             |            | Xiaoxiang River        |            | Shiku Lake             |            |
|                | Mean ± SD <sup>a</sup> | Media<br>n |
| EC (us/cm)     | 304.9±61.4             | 296.9      | 112.8±4.11             | 110.9      | 75.4±11.7              | 71.4       | 263±4.84               | 260.8      | 42451±5199             | 43433      | 292.2±1.41             | 292.8      | 138±15.3               | 129.9      |
| WT(°C)         | 25.1±1.03              | 25.4       | 23.8±1.7               | 23.1       | 19±0.19                | 18.9       | 20.2±1.67              | 19.3       | 26.6±0.46              | 26.5       | 19±0.89                | 18.9       | 21.8±4.98              | 20.9       |
| Salinity (pus) | 0.17±0.02              | 0.17       | 0.05±0.01              | 0.05       | 0.04±0.01              | 0.04       | 0.14±0.01              | 0.14       | 26.8±3.57              | 27.2       | 0.16±0.0               | 0.16       | 0.08±0.01              | 0.07       |
| pH             | 7.82±0.24              | 7.71       | 7.55±0.35              | 7.74       | 7.55±0.04              | 7.54       | 8.05±0.62              | 7.94       | 8.5±0.04               | 8.48       | 8.07±0.18              | 8.06       | 7.72±0.45              | 7.81       |
| DO (mg/L)      | 8.93±0.51              | 9.14       | 8.11±1.21              | 7.79       | 7.77±0.52              | 7.58       | 11.7±3.34              | 10         | 6.12±0.11              | 6.13       | 11±0.47                | 10.8       | 9.5±1.37               | 9.88       |

a standard deviation.

Table S8 Records of the surroundings of the sampling points in the protected area

| protected area | Sampling | Town | Village | Farmland | Factory | Ship | road and bridge |
|----------------|----------|------|---------|----------|---------|------|-----------------|
| Xingfeng River | S1       | ×    | ✓       | ×        | ×       | ×    | ✓               |
|                | S2       | ×    | ✓       | ×        | ×       | ×    | ✓               |
|                | S3       | ×    | ✓       | ×        | ×       | ×    | ✓               |
| Liuxi River    | S4       | ×    | ✓       | ×        | ×       | ×    | ×               |
|                | S5       | ✓    | ×       | ×        | ×       | ✓    | ×               |
|                | S6       | ✓    | ×       | ✓        | ×       | ×    | ✓               |
| Ling River     | S7       | ×    | ×       | ×        | ×       | ×    | ✓               |
|                | S8       | ×    | ×       | ×        | ×       | ×    | ✓               |
|                | S9       | ✓    | ✓       | ✓        | ×       | ×    | ✓               |
| Lian River     | S10      | ✓    | ✓       | ✓        | ×       | ×    | ✓               |
|                | S11      | ×    | ✓       | ×        | ×       | ×    | ✓               |
|                | S12      | ×    | ✓       | ✓        | ×       | ×    | ✓               |
| Yu nan         | S13      | ×    | ✓       | ×        | ×       | ✓    | ×               |
|                | S14      | ×    | ✓       | ×        | ×       | ✓    | ✓               |
|                | S15      | ✓    | ✓       | ✓        | ×       | ✓    | ×               |
| Deqing         | S16      | ✓    | ×       | ×        | ×       | ✓    | ✓               |
|                | S17      | ×    | ✓       | ✓        | ✓       | ✓    | ×               |
|                | S18      | ×    | ✓       | ✓        | ×       | ✓    | ×               |
| Youshu Lake    | S19      | ×    | ×       | ×        | ×       | ×    | ×               |
|                | S20      | ×    | ×       | ×        | ×       | ×    | ×               |
|                | S21      | ✓    | ✓       | ✓        | ×       | ×    | ✓               |

|                              |     |   |   |   |   |   |   |
|------------------------------|-----|---|---|---|---|---|---|
| Shakou River                 | S22 | X | ✓ | ✓ | X | X | X |
|                              | S23 | X | ✓ | X | X | ✓ | X |
|                              | S24 | X | ✓ | X | X | X | X |
| Tian River                   | S25 | ✓ | ✓ | ✓ | X | X | ✓ |
|                              | S26 | ✓ | ✓ | ✓ | ✓ | ✓ | ✓ |
|                              | S27 | ✓ | ✓ | ✓ | ✓ | ✓ | ✓ |
| Zeng River                   | S28 | ✓ | X | X | X | X | X |
|                              | S29 | X | X | X | X | X | ✓ |
|                              | S30 | ✓ | X | X | X | X | ✓ |
| Rong River                   | S31 | ✓ | ✓ | ✓ | X | X | ✓ |
|                              | S32 | ✓ | ✓ | ✓ | X | X | ✓ |
|                              | S33 | ✓ | ✓ | ✓ | X | X | ✓ |
| Jian River                   | S34 | X | X | X | X | ✓ | X |
|                              | S35 | X | X | X | X | ✓ | X |
|                              | S36 | X | X | X | X | ✓ | X |
| Xiaoxiang River<br>(Zaoqing) | S37 | X | ✓ | X | X | ✓ | X |
|                              | S38 | X | ✓ | X | X | ✓ | ✓ |
|                              | S39 | ✓ | ✓ | ✓ | X | ✓ | X |
| Shiku Lake                   | S40 | X | ✓ | ✓ | X | X | X |
|                              | S41 | X | ✓ | X | X | X | X |
|                              | S42 | X | ✓ | ✓ | X | X | ✓ |

✓ (have), X (no have)



## Reference:

1. C. Huang, L.-H. Wu, G.-Q. Liu, L. Shi and Y. Guo, Occurrence and Ecological Risk Assessment of Eight Endocrine-Disrupting Chemicals in Urban River Water and Sediments of South China, *Archives of Environmental Contamination and Toxicology*, 2018, **75**, 224-235.
2. Z. Yan, Y. Liu, K. Yan, S. Wu, Z. Han, R. Guo, M. Chen, Q. Yang, S. Zhang and J. Chen, Bisphenol analogues in surface water and sediment from the shallow Chinese freshwater lakes: Occurrence, distribution, source apportionment, and ecological and human health risk, *Chemosphere*, 2017, **184**, 318-328.
3. J. Liu, J. Guo, Y. Cai, J. Ren, G. Lu, Y. Li and Y. Ji, Multimedia distribution and ecological risk of bisphenol analogues in the urban rivers and their bioaccumulation in wild fish with different dietary habits, *Process Safety and Environmental Protection*, 2022, **164**, 309-318.
4. M. H. Chen, M. Guo, H. Z. Xu, D. Liu, J. Cheng, J. Li, S. H. Zhang and L. L. Shi, [Distribution Characteristics and Potential Risk of Bisphenol Analogues in Surface Water and Sediments of Lake Taihu], *Huan Jing Ke Xue*, 2017, **38**, 2793-2800.
5. D. Liu, J. N. Liu, M. Guo, H. Z. Xu, S. H. Zhang, L. L. Shi and C. Yao, Occurrence, distribution, and risk assessment of alkylphenols, bisphenol A, and tetrabromobisphenol A in surface water, suspended particulate matter, and sediment in Taihu Lake and its tributaries, *Marine Pollution Bulletin*, 2016, **112**, 142-150.
6. F.-J. Peng, C.-G. Pan, M. Zhang, N.-S. Zhang, R. Windfeld, D. Salvito, H. Selck, P. J. Van den Brink and G.-G. Ying, Occurrence and ecological risk assessment of emerging organic chemicals in urban rivers: Guangzhou as a case study in China, *Science of the Total Environment*, 2017, **589**, 46-55.
7. R. Tan, R. Liu, B. Li, X. Liu and Z. Li, Typical Endocrine Disrupting Compounds in Rivers of Northeast China: Occurrence, Partitioning, and Risk Assessment, *Archives of Environmental Contamination and Toxicology*, 2018, **75**, 213-223.
8. Z. Luo, Y. Tu, H. Li, B. Qiu, Y. Liu and Z. Yang, Endocrine-disrupting compounds in the Xiangjiang River of China: Spatio-temporal distribution, source apportionment, and risk assessment, *Ecotoxicology and Environmental Safety*, 2019, **167**, 476-484.
9. Y.-Z. Zhang, X.-F. Song, A. Kondoh, J. Xia and C.-Y. Tang, Behavior, mass inventories and modeling evaluation of xenobiotic endocrine-disrupting chemicals along an urban receiving wastewater river in Henan Province, China, *Water Research*, 2011, **45**, 292-302.
10. C. Huang, L. H. Wu, G. Q. Liu, L. Shi and Y. Guo, Occurrence and Ecological Risk Assessment of Eight Endocrine-Disrupting Chemicals in Urban River Water and Sediments of South China, *Archives of Environmental Contamination and Toxicology*, 2018, **75**, 224-235.
11. Z. Y. Yan, Y. H. Liu, K. Yan, S. M. Wu, Z. H. Han, R. X. Guo, M. H. Chen, Q. L. Yang, S. H. Zhang and J. Q. Chen, Bisphenol analogues in surface water and sediment from the shallow Chinese freshwater lakes: Occurrence, distribution, source apportionment, and ecological and human health risk, *Chemosphere*, 2017, **184**, 318-328.
12. Y. J. Wan, W. Xia, S. Y. Yang, X. Y. Pan, Z. Y. He and K. Kannan, Spatial distribution of bisphenol S in surface water and human serum from Yangtze River

watershed, China: Implications for exposure through drinking water, *Chemosphere*, 2018, **199**, 595-602.

13. D. Liu, S. M. Wu, H. Z. Xu, Q. Zhang, S. H. Zhang, L. L. Shi, C. Yao, Y. H. Liu and J. Cheng, Distribution and bioaccumulation of endocrine disrupting chemicals in water, sediment and fishes in a shallow Chinese freshwater lake: Implications for ecological and human health risks, *Ecotoxicology and Environmental Safety*, 2017, **140**, 222-229.
14. Z. X. Xie, G. H. Lu, Z. H. Yan, J. C. Liu, P. F. Wang and Y. H. Wang, Bioaccumulation and trophic transfer of pharmaceuticals in food webs from a large freshwater lake, *Environmental Pollution*, 2017, **222**, 356-366.
15. R. J. Tan, R. X. Liu, B. Li, X. L. Liu and Z. S. Li, Typical Endocrine Disrupting Compounds in Rivers of Northeast China: Occurrence, Partitioning, and Risk Assessment, *Archives of Environmental Contamination and Toxicology*, 2018, **75**, 213-223.
16. Y. Y. Yang, X. H. Cao, M. M. Zhang and J. Wang, Occurrence and distribution of endocrine-disrupting compounds in the Honghu Lake and East Dongting Lake along the Central Yangtze River, China, *Environmental Science and Pollution Research*, 2015, **22**, 17644-17652.
17. B. Huang, D. Xiong, H. He, X. Li, W. Sun and X. Pan, Characteristics and Bioaccumulation of Progestogens, Androgens, Estrogens, and Phenols in Erhai Lake Catchment, Yunnan, China, *Environmental Engineering Science*, 2017, **34**, 321-332.
18. J. J. Fan, S. Wang, J. P. Tang, Y. N. Dai, L. Wang, S. X. Long, W. X. He, S. L. Liu, J. X. Wang and Y. Yang, [Spatio-Temporal Patterns and Environmental Risk of Endocrine Disrupting Chemicals in the Liuxi River], *Huan Jing Ke Xue*, 2018, **39**, 1053-1064.
19. Y. Yang, X. Cao, M. Zhang and J. Wang, Occurrence and distribution of endocrine-disrupting compounds in the Honghu Lake and East Dongting Lake along the Central Yangtze River, China, *Environmental Science and Pollution Research*, 2015, **22**, 17644-17652.
20. S. He, D. Dong, X. Zhang, C. Sun, C. Wang, X. Hua, L. Zhang and Z. Guo, Occurrence and ecological risk assessment of 22 emerging contaminants in the Jilin Songhua River (Northeast China), *Environmental Science and Pollution Research*, 2018, **25**, 24003-24012.
21. Y.-H. Liu, S.-H. Zhang, G.-X. Ji, S.-M. Wu, R.-X. Guo, J. Cheng, Z.-Y. Yan and J.-Q. Chen, Occurrence, distribution and risk assessment of suspected endocrine-disrupting chemicals in surface water and suspended particulate matter of Yangtze River (Nanjing section), *Ecotoxicology and Environmental Safety*, 2017, **135**, 90-97.
22. B. Huang, X. Li, W. Sun, D. Ren, X. Li, X. Li, Y. Liu, Q. Li and X. Pan, Occurrence, removal, and fate of progestogens, androgens, estrogens, and phenols in six sewage treatment plants around Dianchi Lake in China, *Environmental Science and Pollution Research*, 2014, **21**, 12898-12908.
23. M. Ashfaq, Q. Sun, C. Ma, A. Rashid, Y. Li, S. I. Mulla and C.-P. Yu, Occurrence, seasonal variation and risk evaluation of selected endocrine disrupting compounds and their transformation products in Jiulong river and estuary, China, *Marine Pollution Bulletin*, 2019, **145**, 370-376.
24. X. Shao and J. Ma, Preliminary investigation on 13 endocrine disrupting chemicals in the Songhua River, *Huanjing Kexue Xuebao / Acta Scientiae Circumstantiae*,

2008, **28**, 1910-1915.

25. Z. Zhang, N. Ren, K. Kannan, J. Nan, L. Liu, W. Ma, H. Qi and Y. Li, Occurrence of Endocrine-Disrupting Phenols and Estrogens in Water and Sediment of the Songhua River, Northeastern China, *Archives of Environmental Contamination and Toxicology*, 2014, **66**, 361-369.
26. C. Liu, W. Zhang and B. Shan, Spatial distribution and risk assessment of endocrine disrupting chemicals in the typical station of Pearl River, *Huanjing Kexue Xuebao/Acta Scientiae Circumstantiae*, 2018, **38**, 115-124.
27. L. Wang, G.-G. Ying, F. Chen, L.-J. Zhang, J.-L. Zhao, H.-J. Lai, Z.-F. Chen and R. Tao, Monitoring of selected estrogenic compounds and estrogenic activity in surface water and sediment of the Yellow River in China using combined chemical and biological tools, *Environmental Pollution*, 2012, **165**, 241-249.
28. K. Lei, H.-Y. Pan, Y. Zhu, W. Chen and C.-Y. Lin, Pollution characteristics and mixture risk prediction of phenolic environmental estrogens in rivers of the Beijing-Tianjin-Hebei urban agglomeration, China, *Science of the Total Environment*, 2021, **787**.
29. T. Vega-Morales, Z. Sosa-Ferrera and J. J. Santana-Rodríguez, Evaluation of the Presence of Endocrine-Disrupting Compounds in Dissolved and Solid Wastewater Treatment Plant Samples of Gran Canaria Island (Spain), *Biomed Research International*, 2013, **2013**.
30. S. W. Jin, F. X. Yang, T. Liao, Y. Hui, S. Wen and Y. Xu, Enhanced effects by mixtures of three estrogenic compounds at environmentally relevant levels on development of Chinese rare minnow (*Gobiocypris rarus*), *Environmental Toxicology and Pharmacology*, 2012, **33**, 277-283.
31. H. C. Alexander, D. C. Dill, L. W. Smith, P. D. Guiney and P. Dorn, Bisphenol a: Acute aquatic toxicity, *Environmental Toxicology and Chemistry*, 1988, **7**, 19-26.
32. J. V. Brian, C. A. Harris, M. Scholze, T. Backhaus, P. Booy, M. Lamoree, G. Pojana, N. Jonkers, T. Runnalls, A. Bonfà, A. Marcomini and J. P. Sumpter, Accurate prediction of the response of freshwater fish to a mixture of estrogenic chemicals, *Environmental Health Perspectives*, 2005, **113**, 721-728.
33. A. G. Little and F. Seebacher, Temperature determines toxicity: Bisphenol A reduces thermal tolerance in fish, *Environmental Pollution*, 2015, **197**, 84-89.
34. M. Y. Chen, M. Ike and M. Fujita, Acute toxicity, mutagenicity, and estrogenicity of bisphenol-A and other bisphenols, *Environmental Toxicology*, 2002, **17**, 80-86.
35. Y. Liu, S. Zhang, N. Song, R. Guo, M. Chen, D. Mai, Z. Yan, Z. Han and J. Chen, Occurrence, distribution and sources of bisphenol analogues in a shallow Chinese freshwater lake (Taihu Lake): Implications for ecological and human health risk, *Science of the Total Environment*, 2017, **599**, 1090-1098.
36. J. Moreman, O. Lee, M. Trznadel, A. David, T. Kudoh and C. R. Tyler, Acute Toxicity, Teratogenic, and Estrogenic Effects of Bisphenol A and Its Alternative Replacements Bisphenol S, Bisphenol F, and Bisphenol AF in Zebrafish Embryo-Larvae, *Environmental Science & Technology*, 2017, **51**, 12796-12805.
37. J. Y. Li, W. Li, X. T. Huang and T. D. Ding, Comparative study on the toxicity and removal of bisphenol S in two typical freshwater algae, *Environmental Science and Pollution Research*, 2021, **28**, 36861-36869.
38. T. Tisler, A. Krel, U. Gerzelj, B. Erjavec, M. S. Dolenc and A. Pintar, Hazard identification and risk characterization of bisphenols A, F and AF to aquatic organisms, *Environmental Pollution*, 2016, **212**, 472-479.

39. W. J. Ren, Z. Wang, X. H. Yang, J. N. Liu, Q. Yang, Y. W. Chen and S. B. Shen, Acute toxicity effect of bisphenol a and its analogues on adult and embryo of Zebrafish, *Journal of Ecology and Rural Environment*, 2017, **33**, 372-378.
40. N. Liu, X. Jin, C. Feng, Z. Wang, F. Wu, A. C. Johnson, H. Xiao, H. Hollert and J. P. Giesy, Ecological risk assessment of fifty pharmaceuticals and personal care products (PPCPs) in Chinese surface waters: A proposed multiple-level system, *Environment International*, 2020, **136**.
41. D. J. Caldwell, F. Mastrocco, P. D. Anderson, R. Länge and J. P. Sumpter, Predicted-no-effect concentrations for the steroid estrogens estrone, 17 $\beta$ -estradiol, estriol, and 17 $\alpha$ -ethinylestradiol, *Environmental Toxicology and Chemistry*, 2012, **31**, 1396-1406.
42. K. Czarny, D. Szczukocki, B. Krawczyk, R. Gadzala-Kopciuch and S. Skrzypek, Toxicity of single steroid hormones and their mixtures toward the cyanobacterium *Microcystis aeruginosa*, *Journal of Applied Phycology*, 2019, **31**, 3537-3544.
43. K. O. Kusk, A. M. Christensen and N. Nyholm, Algal growth inhibition test results of 425 organic chemical substances, *Chemosphere*, 2018, **204**, 405-412.
44. S. J. Brennan, C. A. Brougham, J. J. Roche and A. M. Fogarty, Multi-generational effects of four selected environmental oestrogens on *Daphnia magna*, *Chemosphere*, 2006, **64**, 49-55.
45. D. E. Haggard, P. D. Noyes, K. M. WaterS and R. L. Tanguay, Transcriptomic and phenotypic profiling in developing zebrafish exposed to thyroid hormone receptor agonists, *Reproductive Toxicology*, 2018, **77**, 80-93.
46. J. P. Nash, D. E. Kime, L. T. M. Van der Ven, P. W. Wester, F. Brion, G. Maack, P. Stahlschmidt-Allner and C. R. Tyler, Long-term exposure to environmental concentrations of the pharmaceutical ethinylestradiol causes reproductive failure in fish, *Environmental Health Perspectives*, 2004, **112**, 1725-1733.
47. B. I. Escher, N. Bramaz, R. I. L. Eggen and M. Richter, In vitro assessment of modes of toxic action of pharmaceuticals in aquatic life, *Environmental Science & Technology*, 2005, **39**, 3090-3100.
48. S. Jin, F. Yang, T. Liao, Y. Hui, S. Wen and Y. Xu, Enhanced effects by mixtures of three estrogenic compounds at environmentally relevant levels on development of Chinese rare minnow (*Gobiocypris rarus*), *Environmental Toxicology and Pharmacology*, 2012, **33**, 277-283.
49. S. F. Webb, in *Pharmaceuticals in the Environment: Sources, Fate, Effects and Risks*, ed. K. Kümmerer, Springer Berlin Heidelberg, Berlin, Heidelberg, 2001, DOI: 10.1007/978-3-662-04634-0\_16, pp. 203-219.
50. C. Schaefers, M. Teigeler, A. Wenzel, G. Maack, M. Fenske and H. Segner, Concentration- and time-dependent effects of the synthetic estrogen, 17 $\alpha$ -ethinylestradiol, on reproductive capabilities of the zebrafish, *Danio rerio*, *Journal of Toxicology and Environmental Health-Part a-Current Issues*, 2007, **70**, 768-779.
51. S. Lu, C. Y. Lin, K. Lei, M. Xin, B. D. Wang, W. Ouyang, X. T. Liu and M. C. He, Endocrine-disrupting chemicals in a typical urbanized bay of Yellow Sea, China: Distribution, risk assessment, and identification of priority pollutants, *Environmental Pollution*, 2021, **287**, 8.

52. L. Graff, P. Isnard, P. Cellier, J. Bastide, J. P. Cambon, J. F. Narbonne, H. Budzinski and P. Vasseur, Toxicity of chemicals to microalgae in river and in standard waters, *Environmental Toxicology and Chemistry*, 2003, **22**, 1368-1379.
53. M. Hirano, H. Ishibashi, N. Matsumura, Y. Nagao, N. Watanabe, A. Watanabe, N. Onikura, K. Kishi and K. Arizono, Acute toxicity responses of two crustaceans, *Americamysis bahia* and *Daphnia magna*, to endocrine disrupters, *Journal of Health Science*, 2004, **50**, 97-100.
54. H. I. Kwak, M. O. Bae, M. H. Lee, Y. S. Lee, B. J. Lee, K. S. Kang, C. H. Chae, H. J. Sung, J. S. Shin, J. H. Kim, W. C. Mar, Y. Y. Sheen and M. H. Cho, Effects of nonylphenol, bisphenol A, and their mixture on the viviparous swordtail fish (*Xiphophorus helleri*), *Environmental Toxicology and Chemistry*, 2001, **20**, 787-795.
55. M. S. Baptista, T. Stoichev, M. C. P. Basto, V. M. Vasconcelos and M. Vasconcelos, Fate and effects of octylphenol in a *Microcystis aeruginosa* culture medium, *Aquatic Toxicology*, 2009, **92**, 59-64.
56. M.-H. Ha and J. Choi, Effects of Environmental Contaminants on Hemoglobin Gene Expression in *Daphnia magna*: A Potential Biomarker for Freshwater Quality Monitoring, *Archives of Environmental Contamination and Toxicology*, 2009, **57**, 330-337.
